1 Instrumental variable analysis: choice of control variables is  
2 critical and can lead to biased results.

3

4 Fergus Hamilton<sup>1,2</sup>, Todd C Lee<sup>3</sup>, Guillaume Butler-Laporte<sup>3</sup>

5

6 1. MRC Integrative Epidemiology Unit, University of Bristol

7 2. North Bristol NHS Trust

8 3. Division of Infectious Diseases, Department of Medicine, McGill University,

9 Montreal, Canada

10

11

12 Corresponding author:

13

14 Fergus Hamilton;

15 [Fergus.hamilton@bristol.ac.uk](mailto:Fergus.hamilton@bristol.ac.uk)

16

17 Abstract:

18

19 Instrumental variable (IV) analysis is a widely used technique in econometrics to  
20 estimate causal effects in the presence of confounding. A recent application of this  
21 technique was used in a high-profile analysis in *JAMA Internal Medicine* to estimate the  
22 effect of cefepime, a broad-spectrum antibiotic, on mortality in severe infection. There  
23 has been ongoing concern that piperacillin-tazobactam, another broad-spectrum  
24 antibiotic with greater anaerobic activity might be inferior to cefepime, however this has  
25 not been shown in randomized controlled trials. The authors used an international  
26 shortage of piperacillin-tazobactam as an instrument, as during this shortage period,  
27 cefepime was used as an alternative. The authors report a strong mortality effect (5%  
28 absolute increase) with piperacillin-tazobactam. In this paper, we closely examine this  
29 estimate and find it is likely conditional on inclusion of a control variable (metronidazole  
30 usage). Inclusion of this variable is highly likely to lead to collider bias, which we show  
31 via simulation. We then generate estimates unadjusted for metronidazole which are  
32 much closer to the null and may represent residual confounding or confounding by  
33 indication. We highlight the ongoing challenge of collider bias in empirical IV analyses  
34 and the potential for large biases to occur. We finally suggest the authors consider  
35 including these unadjusted estimates in their manuscript, as the large increase in  
36 mortality reported with piperacillin-tazobactam is unlikely to be true.

37 Introduction:

38

39 In a recent issue of *JAMA Internal Medicine*, Chanderraj et al<sup>1</sup> provide an innovative  
40 analysis attempting to use a shortage of a widely used broad-spectrum antimicrobial,  
41 piperacillin-tazobactam (TZP), to conduct a comparative effectiveness study versus  
42 cefepime (CPM), an agent used as a replacement during this period which has a similar  
43 spectrum of activity except less anaerobic activity. Their instrumental variable (IV)  
44 analysis<sup>1</sup> utilises the ‘natural experiment’ of substitution of TZP with CPM over this  
45 period in a manner which is, in principle, unrelated to other confounders. They  
46 hypothesize that the additional anti-anaerobic activity of TZP might lead to increased  
47 mortality via effects on the microbiome or resistome. Their primary analysis using a  
48 two-stage-least-squares (TSLS) IV analysis found that TZP use was associated with a 5%  
49 absolute increase in mortality (95% CI 1.8-8.1%,  $p = 0.002$ ). This was reported as:

50

51 *“administration of piperacillin-tazobactam was associated with higher mortality and*  
52 *increased duration of organ dysfunction compared with cefepime”*

53

54 This is in stark contrast to recent randomized controlled trial data directly comparing  
55 the two drugs which do not suggest such a benefit.<sup>2</sup> Chanderraj et al’s result was widely  
56 discussed (Altmetric score 457 on 2<sup>nd</sup> July) and highlighted in *NEJM Journal Watch*<sup>3</sup>,  
57 which concluded:

58

59 *“Therefore, we can infer that among severely ill patients with undifferentiated sepsis,*  
60 *treatment with cefepime rather than PTZ [piperacillin-tazobactam] is associated with an*  
61 *absolute mortality reduction at 90 days.”*

62

63 Interestingly, despite a marked reduction in piperacillin-tazobactam and increase in  
64 cefepime usage during the shortage period, there was no independent effect of the  
65 shortage period on mortality (20.8% outside shortage, 19.8% within shortage,  $p = 0.31$ ).  
66 This is unusual and raises a concern. In general, TSLS estimates are more imprecise and  
67 have larger standard errors than the independent IV-outcome analysis reflecting the

68 uncertainty involved in the twostep process.<sup>4</sup> Less formally, there are few plausible  
69 explanations whereby all three of the below hold:

70

- 71 1. The instrument (shortage period) strongly influences the exposure (cefepime  
72 usage)
- 73 2. The instrument (shortage period) has no influence on the outcome (mortality)
- 74 3. The exposure (cefepime usage) has a very strong effect on the outcome  
75 (mortality)

76

77 In this short analysis, we explored potential reasons for the difference between the TSLS  
78 estimate (suggesting strong evidence of benefit) and the raw analysis (suggesting no  
79 effect) and postulate that this has occurred due to erroneous inclusion of control  
80 variables in the analysis. Control variables are often included to increase precision of  
81 TSLS estimation but should only be included under certain conditions and when they  
82 are upstream of both the instrument and the outcome.<sup>5</sup> For example, an analysis using  
83 state or country level cigarette taxation as an instrument for the outcome of lung cancer  
84 might include socio-economic status of the participant as a control variable to increase  
85 precision. Or similarly, analyses using genetic variants as instruments might include  
86 age of participants as control variables, as this cannot be plausible caused by genetics,  
87 but may influence the outcome.

88

89 However, the inclusion of control variables that are downstream of the IV should  
90 generally be avoided<sup>5</sup>, and can be considered as being similar to inappropriately  
91 adjusting for post-randomisation variables in a randomised trial.<sup>6</sup> In the presented  
92 analyses, the authors adjust for a number of demographic variables but also control for  
93 metronidazole usage in both stages of the regression. This is despite the authors  
94 reporting that the shortage period strongly influences metronidazole prescription  
95 (eFigure 2 in the original publication).

96

97 This is inappropriate and has the potential to lead to collider bias<sup>7</sup> if unmeasured  
98 confounding affects both MTZ usage and mortality which is probable, as metronidazole  
99 usage is a marker of sickness (particularly when cefepime is used, as metronidazole is

100 often co-prescribed for intra-abdominal infection where mortality is high). This collider  
101 bias induces an association between the IV and confounders (e.g. disease severity) of  
102 the association between the exposure (cefepime usage) and outcome (mortality). This  
103 directly contravenes a core assumption of IV analyses.

104

105 We first show via simulation why the addition of metronidazole into the IV analysis  
106 could lead to bias. We then present our own analysis using summary data from the trial  
107 to estimate the causal effect unadjusted for control variables.

108

109

110 Methods:

111

112 *Simulation study*

113

114 For our simulation study, we aimed to match the potential real-life causal data-  
115 generating process, although we recognise such a simulation is an oversimplification,  
116 and the major value is in demonstrating the potential collider bias. We generated 5  
117 simulated variables, reflecting the key components: Z (the shortage period,  
118 representing the instrument), X (the exposure, use of cefepime), M (metronidazole  
119 usage), Y (the outcome, mortality), U (unmeasured confounding). We set up the  
120 relationship between these variables as per **Figure 1**.

121

122 **Figure 1:** A directed acyclic graph (DAG) describing our simulation. Each point  
123 represents a variable, while each arrow represents the simulated effect direction.

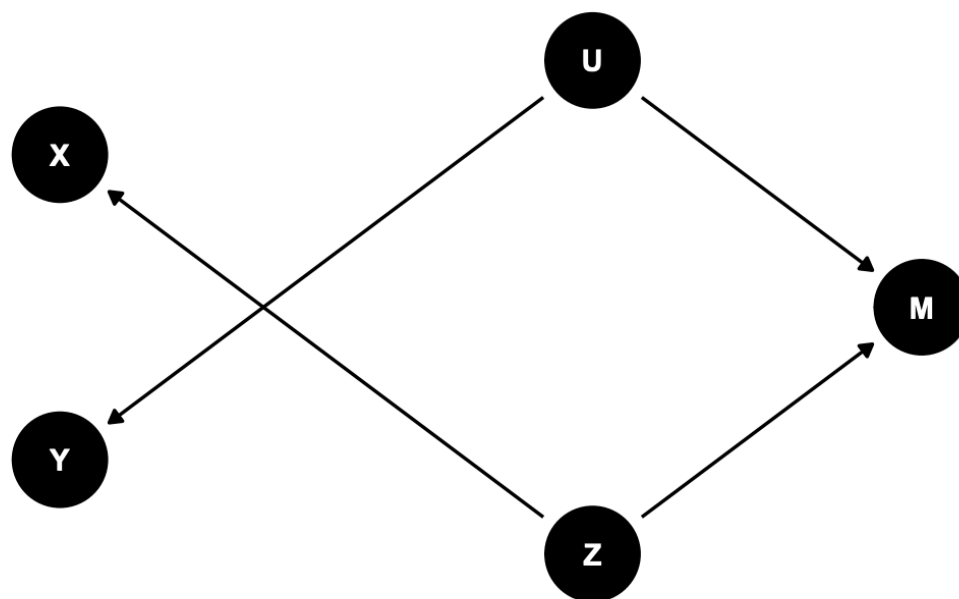

124

125

126 In this situation, we have a strong relationship between Z and X (as expected, the  
127 shortage period led to a large increase in cefepime prescribing), but we also have a  
128 strong relationship between Z and M (as was reported in their eFigure2). We also  
129 simulated no causal effect of the exposure on the outcome (i.e. the prescription of  
130 cefepime has no effect on mortality). This can be seen by the lack of an arrow between

131 X and Y. Finally, we simulated unmeasured confounding (U) which influences both  
132 mortality and metronidazole usage. This variable represents the fact that metronidazole  
133 usage is influenced by other factors that themselves associate with mortality (e.g. UTI  
134 (no metronidazole, lower mortality) vs. intrabdominal or undifferentiated sepsis  
135 (metronidazole, higher mortality)). We can strongly suspect this is the case, as  
136 metronidazole users had a strong marginal association with mortality in the reported  
137 logistic regression analysis (OR 1.54, 95% CI 1.32, 1.8, data from eTable 6 in the original  
138 publication<sup>1</sup>).

139  
140 Simulated variables were generated in R for 5,000 participants, using the *tidyverse*  
141 package, and IV analysis was performed using the AER package to generate estimates.  
142 Further technical details and statistical code are provided in **Supplementary Note 1**. Of  
143 note, we can also simulate the equally plausible situation where M is entirely  
144 downstream of X, rather than Z (as the decision to give metronidazole is made after the  
145 decision to give piperacillin-tazobactam, and there is no independent effect of Z onto M.  
146 This does not fundamentally alter results but is reported in Supplementary Note 1 for  
147 completeness.

148  
149 The important detail in this simulation is that we should not have any evidence of an  
150 effect in IV analyses; there is no relationship between the exposure and the outcome,  
151 and evidence of a relationship is a sign of bias.

152  
153 *Generation of summary level estimates from the original manuscript*

154  
155 Although estimates in IV analyses are usually made using individual level data, it is  
156 possible to generate estimates using summary level data. This is commonly performed  
157 in Two-Sample Mendelian randomisation, where only the summary effects of a genetic  
158 variant on an exposure and outcome are required.<sup>8</sup>

159  
160 We can therefore estimate, accepting a degree of error, a TSLS estimate that is  
161 unadjusted for the control variables in Chanderraj et al by simply calculating the IV-  
162 outcome estimate, and dividing this by the IV-exposure estimate (the Wald ratio). The

163 standard error of this estimate can be approximated by dividing the standard error of the  
164 IV-outcome estimate by the IV-exposure estimate. We calculate this (full details in the  
165 **Supplementary Note 2**) and compare this with the presented analyses.

166

167

168 **Ethics**

169

170 This analysis is a re-analysis of presented work and requires no ethical approval

171

172 **Funding**

173

174 FH's time was funded by the NIHR Clinical Lectureship scheme.



175 Results:

176

177 *Simulation study*

178

179 In our simulation study, we aimed to closely replicate the Chanderraj et al’s analysis.<sup>1</sup> In  
180 the presented paper, they report that the IV strongly influences metronidazole (M)  
181 usage, alongside having a large effect on the exposure (X). In our simulation, we have no  
182 causal effect of the exposure on the outcome, so when analyses are run unadjusted for  
183 metronidazole, IV estimates are null (**Figure 2**).

184

185

186 **Figure 2:** Simulated estimates of the effect of adjusting for metronidazole on an  
187 outcome using the causal model above. In the unadjusted model, causal estimates are  
188 close to the null, and are unbiased. In the adjusted model, estimates are biased and  
189 show a causal effect of X (“cefepime”) on the outcome.

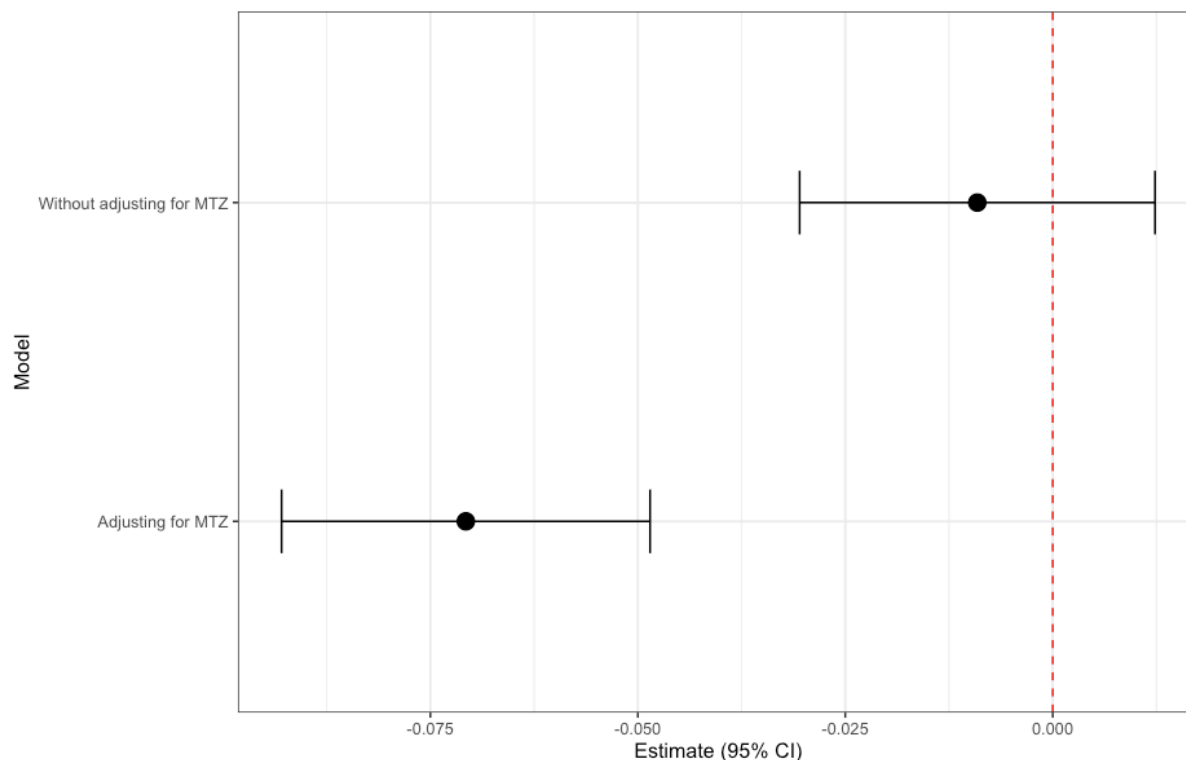

190

191

192 However, when we include metronidazole in the model we induce a bias, and we get  
193 strong evidence of a protective effect of cefepime. This occurs despite there being no

194 causal effect of cefepime on the outcome. The reasons for this counterintuitive result  
195 are worth discussing: the bias occurs because we have opened a path between the  
196 unmeasured confounding (U) and the outcome. Essentially, we bring back most of the  
197 bias that IV analyses are meant to protect against (unmeasured confounding).  
198 Consider that the patient only gets metronidazole during the shortage if the clinician  
199 thinks the patient is sick enough to require coverage for anaerobes which cefepime  
200 itself does not provide. By adjusting for metronidazole, we induce a negative  
201 relationship between patient sickness and the instrument that then biases the estimate  
202 on mortality.

203  
204 This bias occurs in the same way when performing analyses stratified by metronidazole  
205 usage. Because metronidazole usage associates with mortality, in both metronidazole  
206 users and non-users, there is a negative relationship induced between the instrument  
207 and mortality which leads to biased estimates. Other examples of similar collider  
208 biases have been widely described in COVID-19 and are likely to explain (some) of the  
209 ‘obesity paradox’, the paradoxical relationship between increased BMI and better  
210 critical disease outcomes in severe infection.<sup>9</sup> It is important to note that this bias also  
211 occurs if the causal path we present is incorrect, and metronidazole usage is entirely  
212 downstream of piperacillin-tazobactam usage, and the IV has no direct effect on this  
213 **(Supplementary Note 1)**.

214  
215 In summary, our simulation study shows that in the presence of unmeasured  
216 confounding of metronidazole usage and mortality, adjusting for metronidazole will  
217 induce bias in estimates of the effect of cefepime on mortality.

218  
219 *Generation of new estimates*

220  
221 Although our simulation study provided support for potential bias, to test this we  
222 needed to generate estimates unadjusted for metronidazole. We attempted to use the  
223 reported summary level data and estimated the causal effect of cefepime on mortality.

224

225 Details of this calculation are provided in **Supplementary Note 2** but can be  
226 summarised as calculating the effect of the shortage on piperacillin-tazobactam usage  
227 (IV-exposure effect, -0.659) and the effect of the shortage on mortality (IV-outcome  
228 effect , -0.0650) using logistic regression, and using the Wald ratio to generate the IV  
229 estimate of -0.065/-0.659, which corresponds to a log odds ratio of 0.098, and an odds  
230 ratio of 1.10, 95% CI 0.91-1.33. Formulas for standard error are in the **Supplementary**  
231 **Note 2**. The absolute change in mortality is then calculated using the odds ratio and  
232 baseline mortality.

233

234 Our final estimate is an absolute risk increase of 2.2% with piperacillin-tazobactam  
235 usage (95% CI -1.8% to 7.0%), weaker and more imprecisely estimated than their  
236 primary estimate (5%; 95% CI 1.8-8.1%, **Figure 3**). This does not provide compelling  
237 evidence of a strong effect of superiority of cefepime. We recognise the limitations of  
238 this analysis, but are unable to do more detailed analysis without access to individual  
239 level data.

240

241 **Figure 3:** Absolute risk increase associated with piperacillin-tazobactam usage  
242 reported in the original manuscript, and with our estimates from summary level data.  
243 We recognise these are likely to be imprecise than estimates using individual level data.

244

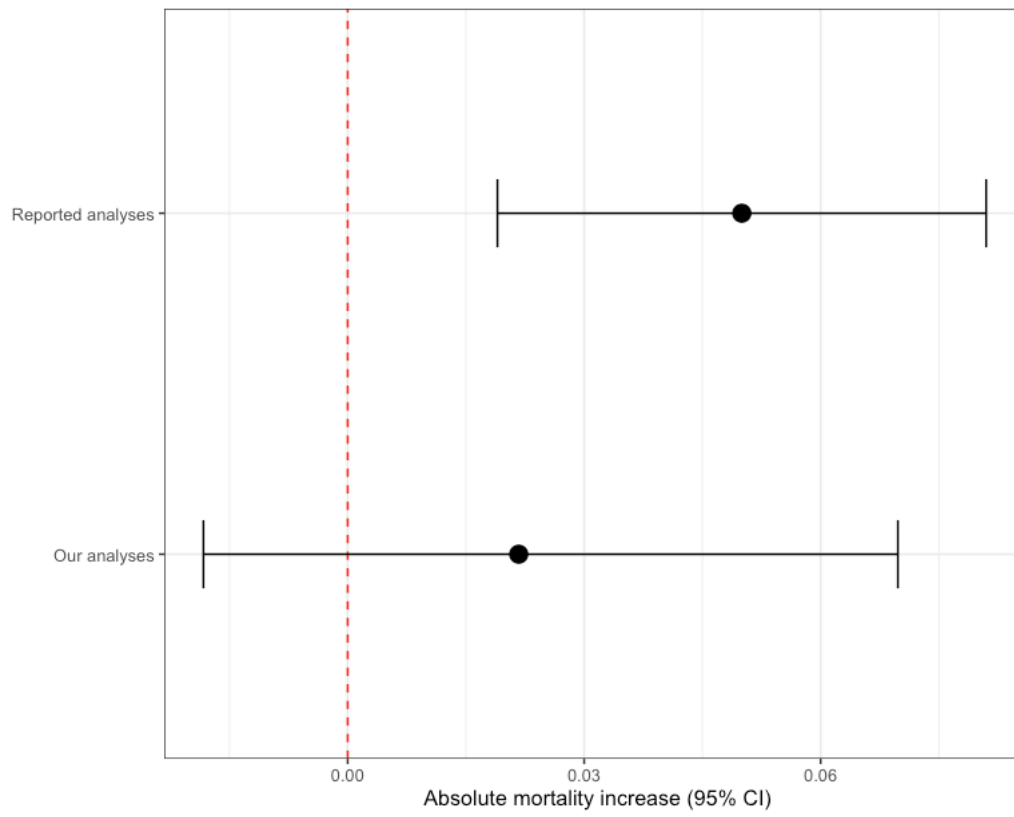

245

246

247

248

249 **Discussion**

250

251 Instrumental variable analyses can allow for causal inference when randomised trials  
252 are lacking, unethical, or impractical. Although in principle simple analytically, it is clear  
253 from our results above that they can be seriously biased when inappropriate control  
254 variables are included.

255

256 In this particular case, we think it is clear that the addition of metronidazole into the IV  
257 estimation is inappropriate, as it is a clinically relevant decision which is downstream of  
258 the instrumental variable. This can be seen as adjusting for a post-randomisation  
259 covariate in a randomised trial, which is explicitly warned against.

260

261 We recognise our simulations are based on one specified causal model which is an  
262 oversimplification of the true model. We do not state with certainty that the model we  
263 present represents truth, but it is certain that metronidazole usage is associated with  
264 more severe disease (i.e. there is unmeasured confounding), and that metronidazole  
265 usage is strongly associated with the IV. Using domain specific knowledge, our causal  
266 model seems plausible but we would encourage the authors to present further data  
267 supporting or refuting our analysis. We did ask the authors to provide analyses  
268 unadjusted for metronidazole which would help confirm if collider bias was occurring  
269 or whether our causal model was appropriate but they could not provide this data citing  
270 institutional regulations, so we are limited to our summary analysis, which does provide  
271 evidence that the unadjusted effect is much close to the null.

272

273 The authors do additionally present a secondary analysis not discussed above: whereby  
274 the exposure is the receipt of *either* piperacillin-tazobactam or metronidazole, as both  
275 of these have anaerobic activity. We note that the effect reported in this analysis is even  
276 stronger (12% increase in absolute mortality), and highly implausible given the null  
277 effect in the unadjusted analyses for piperacillin-tazobactam alone. This also raises  
278 challenges for IV analyses: the exposure is not a single drug, so we cannot state  
279 estimates represents the causal effect of increasing piperacillin-tazobactam or  
280 metronidazole individually: rather it represents the causal effect of “increased

281 piperacillin-tazobactam and metronidazole usage” as a combined variable and cannot  
282 be interpreted as saying that giving more of either drug individually would lead to  
283 increased mortality. As with the primary analysis, it is likely that bias is generated via  
284 unmeasured confounding in this combined variable. It is worth thinking of the  
285 plausibility of situations whereby the causal effect would be predicted to almost double  
286 by changing the exposure definition to include a composite exposure that is less  
287 compellingly related to the IV (which was a shortage of piperacillin-tazobactam only).

288

289 The data reported from Chanderraj et al is therefore actually highly consistent with the  
290 recent ACORN trial<sup>2</sup>, and should be used as evidence that there is unlikely to be a large  
291 difference in mortality between piperacillin-tazobactam and cefepime based on these  
292 two studies. This is reassuring, and contrary to some of the reports surrounding this  
293 paper,<sup>3</sup> clinicians should not favour cefepime simply based on this evidence.

294

295 We strongly suggest that consideration should be given to reporting the unadjusted  
296 results in the original manuscript.<sup>1</sup> Currently, readers of the manuscript might assume  
297 that cefepime is a far superior agent to piperacillin-tazobactam which is not likely to be  
298 the case.

299

300 More broadly, we make the point that IV analyses are challenging to perform, and  
301 susceptible to biases like other observational studies. We recommend that authors,  
302 editors, and readers, interpret IV analyses cautiously, particularly when results appear  
303 to be contingent on a particular analytical set-up. The reason for our investigation of this  
304 issue was the identification that there was no convincing relationship between the  
305 shortage period and overall mortality but a 5% increase in mortality with piperacillin-  
306 tazobactam reported in the IV analysis. Although it is technically possible for IV  
307 estimates to be more precise and stronger than the raw outcome onto instrument  
308 relationship, this is highly unusual. It does not seem plausible that during a period in  
309 which there was almost complete changeover from piperacillin-tazobactam to  
310 cefepime, and in which there was no change in overall mortality, that cefepime could be  
311 associated with a 5% absolute reduction in mortality. The secondary analyses reporting  
312 an even larger 12% increase in mortality are equally implausible.

313

314 This highlights the value of examining each step in any analysis, and examining it for  
315 plausibility, and when implausible estimates are generated, examining the model inputs  
316 and outputs for potential bias and its causes.

317

318 **Conclusion:**

319

320 The reported estimates of benefit of cefepime in Chanderraj et al are likely due to  
321 collider bias due to conditioning on metronidazole. Corrected causal analyses identify a  
322 much-reduced effect. The authors should consider correcting the original study to  
323 include estimates unadjusted for metronidazole.

324

325

326

327

328

329

330 **REFERENCES:**

331

332

333 1. Chanderraj R, Admon AJ, He Y, et al. Mortality of Patients With Sepsis Administered  
334 Piperacillin-Tazobactam vs Cefepime. *JAMA Intern Med* [Internet] 2024; Available  
335 from: <http://dx.doi.org/10.1001/jamainternmed.2024.0581>

336 2. Qian ET, Casey JD, Wright A, et al. Cefepime vs Piperacillin-Tazobactam in Adults  
337 Hospitalized With Acute Infection: The ACORN Randomized Clinical Trial. *JAMA*  
338 [Internet] 2023 [cited 2024 Jun 11];330(16):1557–67. Available from:  
339 <https://jamanetwork.com/journals/jama/fullarticle/2810592>

340 3. Dressler DD, MSc MD. Cefepime vs. Piperacillin-Tazobactam for Sepsis: The Debate  
341 Continues [Internet]. 2024 [cited 2024 Jul 10]; Available from:  
342 [https://www.jwatch.org/na57489/2024/05/21/cefepime-vs-piperacillin-](https://www.jwatch.org/na57489/2024/05/21/cefepime-vs-piperacillin-tazobactam-sepsis-debate)  
343 [tazobactam-sepsis-debate](https://www.jwatch.org/na57489/2024/05/21/cefepime-vs-piperacillin-tazobactam-sepsis-debate)

- 344 4. Greene WH. Econometric Analysis [Internet]. Prentice Hall; 2003. Available from:  
345 <https://play.google.com/store/books/details?id=JkWAQAAMAAJ>
- 346 5. Deuchert E, Huber M. A cautionary tale about control variables in IV estimation. Oxf  
347 Bull Econ Stat [Internet] 2017;79(3):411–25. Available from:  
348 <https://onlinelibrary.wiley.com/doi/10.1111/obes.12177>
- 349 6. ICH E9 statistical principles for clinical trials - Scientific guideline [Internet]. [cited  
350 2024 Jun 3]; Available from: [https://www.ema.europa.eu/en/ich-e9-statistical-](https://www.ema.europa.eu/en/ich-e9-statistical-principles-clinical-trials-scientific-guideline)  
351 [principles-clinical-trials-scientific-guideline](https://www.ema.europa.eu/en/ich-e9-statistical-principles-clinical-trials-scientific-guideline)
- 352 7. Griffith GJ, Morris TT, Tudball M, et al. Collider bias undermines our understanding  
353 of COVID-19 disease risk and severity [Internet]. bioRxiv. 2020; Available from:  
354 <http://dx.doi.org/10.1101/2020.05.04.20090506>
- 355 8. Sanderson E, Glymour MM, Holmes MV, et al. Mendelian randomization. Nature  
356 Reviews Methods Primers [Internet] 2022 [cited 2023 May 22];2(1):1–21. Available  
357 from: <https://www.nature.com/articles/s43586-021-00092-5>
- 358 9. Dobner J, Kaser S. Body mass index and the risk of infection - from underweight to  
359 obesity. Clin Microbiol Infect [Internet] 2018;24(1):24–8. Available from:  
360 <http://dx.doi.org/10.1016/j.cmi.2017.02.013>
